# Supplementary material
Source: HighWire-hosted journal article supplement (https://fn.bmj.com/content/105/5/550)
Supplement: inline-supplementary-material-3 [file inline-supplementary-material-3.pdf]

|                 |         | 6 L/min                        |          |                                       |          | 8 L/min                        |          |                                       |          |
|-----------------|---------|--------------------------------|----------|---------------------------------------|----------|--------------------------------|----------|---------------------------------------|----------|
|                 |         | Pressure (cm H <sub>2</sub> O) |          | Imposed Work of breathing (mJ/breath) |          | Pressure (cm H <sub>2</sub> O) |          | Imposed Work of breathing (mJ/breath) |          |
| System          | ID (mm) | Mean                           | CI (95%) | Mean                                  | CI (95%) | Mean                           | CI (95%) | Mean                                  | CI (95%) |
| Fisher & Paykel | 3       | 28.1 (28,06-28,12)             |          | 74.8 (74,66-74,89)                    |          | 39.7 (39,61-39,72)             |          | 82.2 (82,04-82,27)                    |          |
|                 | 4       | 12.1 (12,10-12,14)             |          | 38.0 (37,90-38,09)                    |          | 15.2 (15,14-15,18)             |          | 44.4 (44,28-44,52)                    |          |
|                 | 6       | 8.0 (8,00-8,03)                |          | 15.8 (15,63-15,87)                    |          | 9.1 (9,10-9,14)                |          | 18.1 (18,01-18,25)                    |          |
|                 | 8       | 6.0 (5,99-6,03)                |          | 6.3 (6,17-6,49)                       |          | 6.4 (6,42-6,45)                |          | 6.8 (6,70-6,96)                       |          |
|                 | 10      | 5.6 (5,59-5,62)                |          | 5.0 (4,85-5,12)                       |          | 5.9 (5,85-5,89)                |          | 5.2 (4,93-5,45)                       |          |
|                 | 12      | 5.8 (5,76-5,80)                |          | 4.6 (4,37-4,77)                       |          | 6.0 (5,96-5,99)                |          | 4.9 (4,73-5,11)                       |          |
|                 | FP      | 5.8 (5,80-5,85)                |          | 5.7 (5,35-5,99)                       |          | 6.2 (6,17-6,22)                |          | 6.1 (5,84-6,37)                       |          |
| Hudson          | 3       | 27.7 (27,66-27,71)             |          | 74.2 (74,09-74,23)                    |          | 36.7 (36,66-36,74)             |          | 81.4 (81,33-81,49)                    |          |
|                 | 4       | 12.3 (12,33-12,35)             |          | 39.6 (39,49-39,61)                    |          | 15.2 (15,19-15,21)             |          | 46.1 (46,06-46,20)                    |          |
|                 | 6       | 8.6 (8,62-8,65)                |          | 20.1 (19,94-20,18)                    |          | 10.0 (10,01-10,03)             |          | 23.6 (23,50-23,68)                    |          |
|                 | 8       | 6.6 (6,55-6,60)                |          | 10.8 (10,69-10,91)                    |          | 7.2 (7,23-7,26)                |          | 12.5 (12,39-12,61)                    |          |
|                 | 10      | 6.3 (6,30-6,34)                |          | 9.5 (9,32-9,76)                       |          | 6.9 (6,88-6,93)                |          | 11.2 (10,97-11,32)                    |          |
|                 | 12      | 6.3 (6,28-6,32)                |          | 9.1 (8,91-9,21)                       |          | 6.8 (6,77-6,82)                |          | 10.6 (10,49-10,74)                    |          |
|                 | FP      | 6.4 (6,37-6,43)                |          | 10.1 (9,84-10,35)                     |          | 7.0 (7,02-7,06)                |          | 12.0 (11,67-12,29)                    |          |
| RAM             | 3       | 26.7 (26,70-26,77)             |          | 78.3 (78,19-78,40)                    |          | 35.0 (34,98-35,08)             |          | 83.1 (83,02-83,22)                    |          |
|                 | 4       | 11.4 (11,43-11,45)             |          | 56.2 (56,09-56,26)                    |          | 13.9 (13,85-13,89)             |          | 60.3 (60,22-60,42)                    |          |
|                 | 6       | 7.8 (7,76-7,79)                |          | 39.5 (39,38-39,52)                    |          | 8.7 (8,69-8,71)                |          | 41.0 (40,85-41,07)                    |          |
|                 | 8       | 5.7 (5,65-5,67)                |          | 30.3 (30,23-30,41)                    |          | 6.0 (5,94-5,97)                |          | 30.8 (30,67-30,92)                    |          |
|                 | 10      | 5.3 (5,24-5,27)                |          | 29.1 (28,93-29,22)                    | A        | 5.4 (5,35-5,38)                |          | 29.2 (29,08-29,36)                    | A        |
|                 | 12      | 5.3 (5,32-5,36)                |          | 28.7 (28,57-28,80)                    |          | 5.4 (5,41-5,44)                |          | 29.0 (28,87-29,10)                    |          |
|                 | FP      | 5.5 (5,48-5,51)                |          | 29.4 (29,29-29,58)                    |          | 5.6 (5,61-5,65)                |          | 30.0 (29,76-30,15)                    |          |

**Supplementary Table 3:** Effect of two different driver flows.

Means and confidence intervals given for pressure (white background) and imposed work of breathing (gray background). Un-paired t-tests were performed comparing the two different flows and  $p < 0.05$  was considered significant. The non-significant comparison is indicated rowwise by letter (A). The original Fisher & Paykel tubing (FP) was included for reference.
